# Supplementary material for: Mammary fibroblasts reduce apoptosis and speed estrogen-induced hyperplasia in an organotypic MCF7-derived duct model
Source: PubMed Central journal article supplement (PMC5940820; doi:10.1038/s41598-018-25461-1), 2018-05-08
Supplement: 41598_2018_25461_MOESM1_ESM.pdf [file 41598_2018_25461_MOESM1_ESM.pdf]

## Supplemental Files

### **Mammary fibroblasts reduce apoptosis and speed estrogen-induced hyperplasia in an organotypic MCF7-derived duct model**

Molly M. Morgan<sup>a</sup>, Megan K. Livingston<sup>a,b</sup>, Jay W. Warrick<sup>a</sup>, Eli M. Stanek<sup>a</sup>, Elaine T. Alarid<sup>c</sup>,  
David J. Beebe<sup>a,\*</sup>, Brian P. Johnson<sup>a,\*</sup>

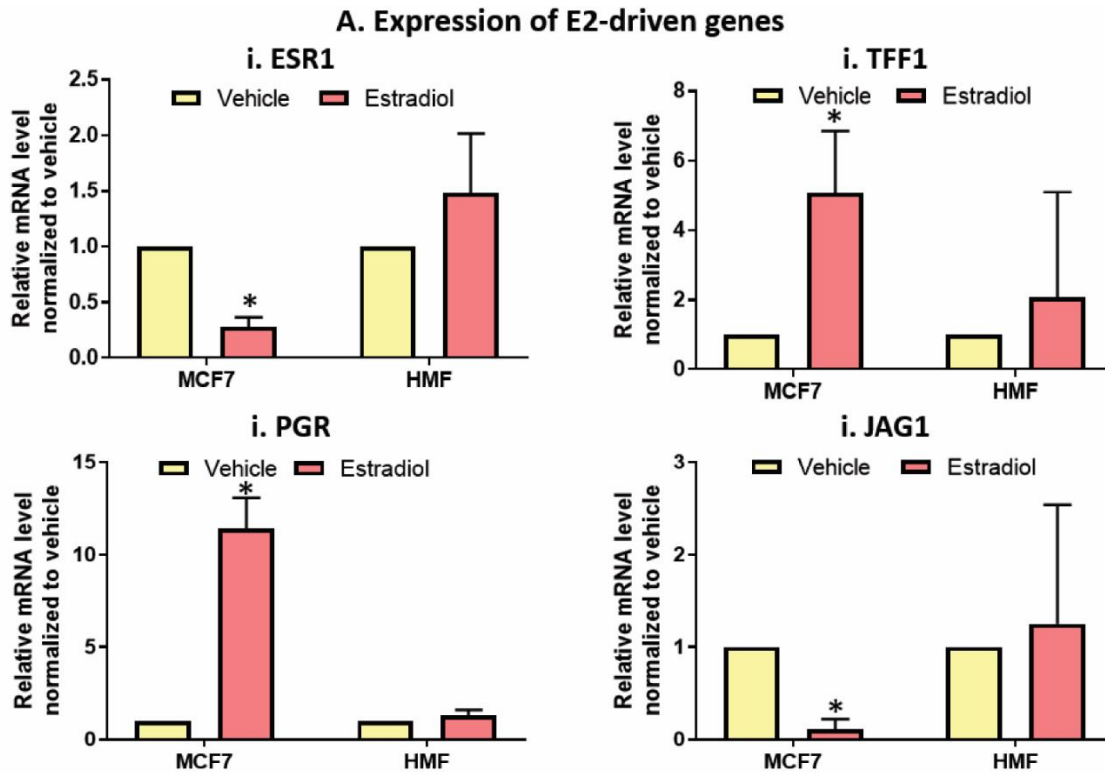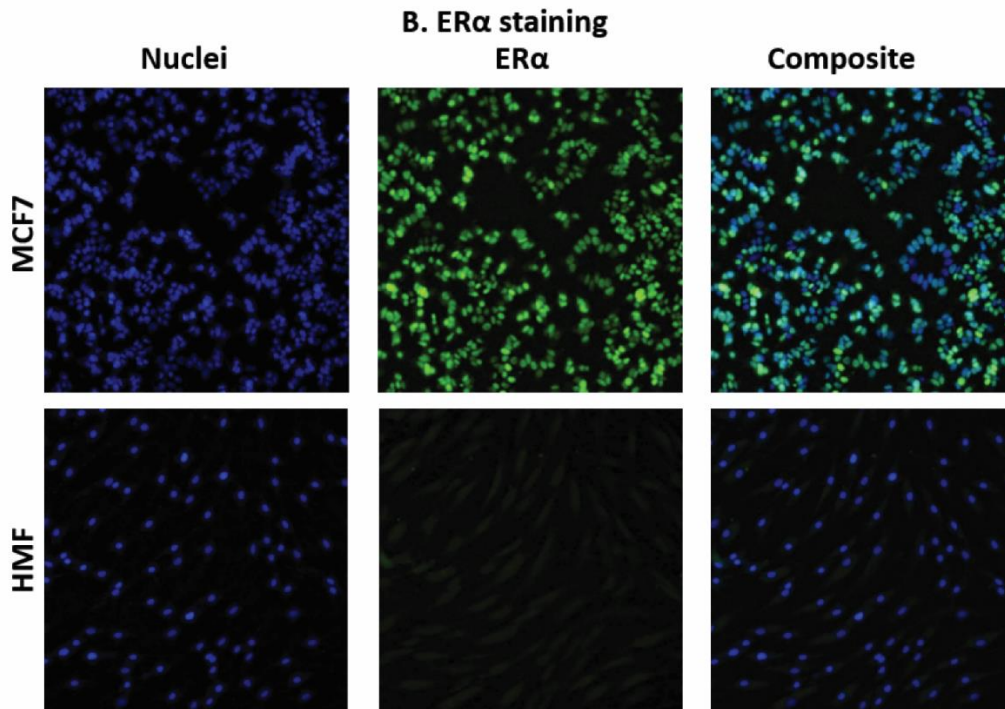

Supplemental Figure 1. ER $\alpha$ - and ER $\beta$ - driven genes are not induced in HMFs after E2 exposure, and HMFs do not stain positively for ER $\alpha$  protein. (A) After MCF7 cells and HMF cells were exposed to E2 for 24 hours, qRT-PCR was used to evaluate expression of ER $\alpha$ -driven genes *ESR1*, *TFF1*, and *PGR* and ER $\beta$ -driven gene *JAG1*. Each sample was normalized to the expression of the housekeeping gene *GAPDH*. A student's t test was used to evaluate significance. \* = vs. respective vehicle ( $p < 0.05$ ). (B) MCF7 cells and HMF-621-tert cells were stained for ER $\alpha$  and nuclei.

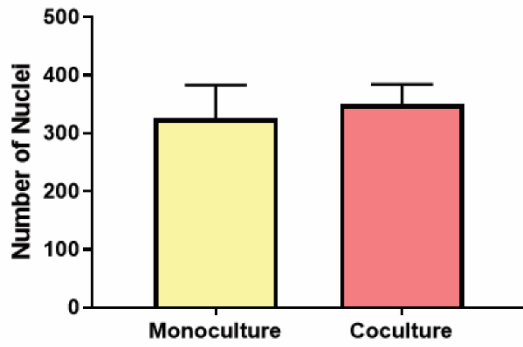

Supplemental Figure 2. **Cell number is similar in monoculture and co-culture the day following seeding.** The day following cell seeding, samples were fixed and stained for nuclei to quantify cell number.

### A. Viability

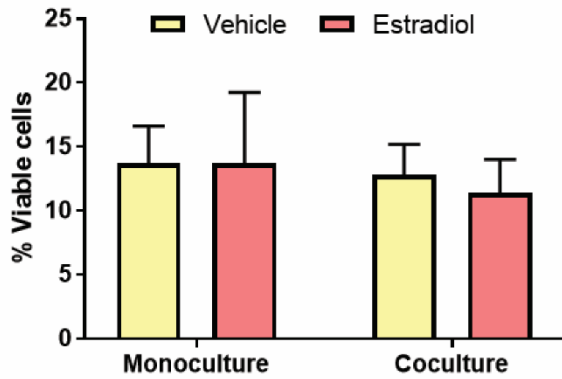

### B. Cell Number

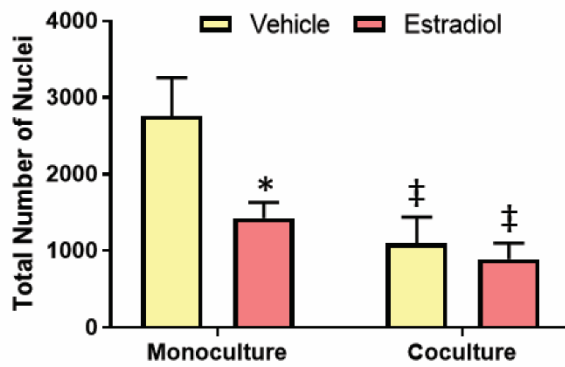

Supplemental Figure 3. **Estrogen as well as fibroblasts reduced the number of dead cells leaving the lumen.** Culture media was collected from lumens after 24, 48, and 72 hours of estrogen exposure. **(A)** Cell viability was measured by determining the amount of live (calcein positive) cells relative to the total cell population. The viability shown is the average viability of the 24, 48, and 72-hour dose periods. **(B)** Cell number was evaluated by staining for nuclear marker Hoescht and quantifying the total number of nuclei. Cell number shown is the sum of cells lost during the 24, 48, and 72-hour time points.

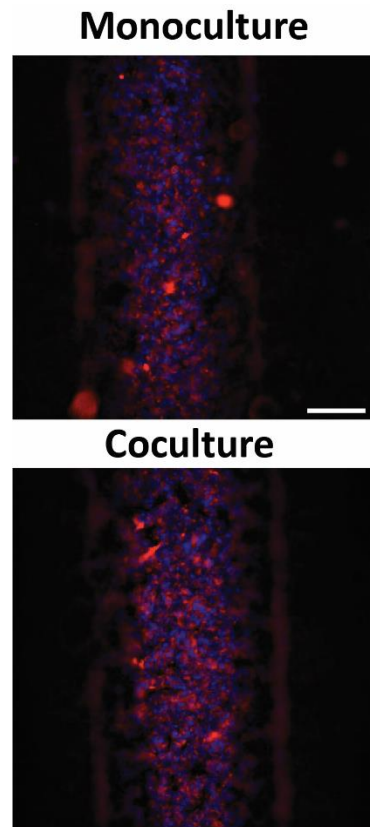

Supplemental Figure 4. **Lumen confluence of monoculture and co-culture appeared similar the day following seeding.** The day following seeding, samples were fixed and stained with phalloidin (red) and Hoescht (blue) to visualize F-Actin and nuclei, respectively. Scale bar represents 100  $\mu\text{m}$ .

| Endpoint                      | Culture Condition | Estrogen Treatment | Interaction |
|-------------------------------|-------------------|--------------------|-------------|
| ER Transactivation            | <0.0001           | <0.0001            | 0.0005      |
| ER Protein                    | 0.0083            | <0.0001            | 0.0418      |
| Number of Nuclei              | <0.0001           | <0.0001            | 0.6148      |
| Proliferation                 | 0.2597            | <0.0001            | 0.3561      |
| Cytotoxicity                  | 0.0005            | 0.0006             | 0.0226      |
| Apoptosis                     | 0.0006            | 0.0226             | 0.0046      |
| Number of Cells Lost          | <0.0001           | <0.0001            | 0.0011      |
| Viability of Cells Lost       | 0.338             | 0.6653             | 0.6653      |
| Hyperplasia (3 Day Exposure)  | 0.0034            | 0.01               | 0.024       |
| Hyperplasia (10 Day Exposure) | 0.0045            | <0.0001            | 0.147       |

Supplemental Table 1. **Summary of two-way ANOVA results.**

| Publication                               | Estrogen Responsive                                                                                                   | Presence of Hyperplasia | Polarized Epithelial Cells                                                                                    | Stromal Component   | Method Used to Acquire Tissue Structure                                                                               | ECM                                   |
|-------------------------------------------|-----------------------------------------------------------------------------------------------------------------------|-------------------------|---------------------------------------------------------------------------------------------------------------|---------------------|-----------------------------------------------------------------------------------------------------------------------|---------------------------------------|
| <b>Morgan, 2018</b>                       | Yes, E2 affected ER protein, ER transactivation, cell number, proliferation, cytotoxicity, apoptosis, and hyperplasia | Yes                     | Yes                                                                                                           | Fibroblasts         | Seeded into engineered lumen; formed lumen structure                                                                  | Yes; Collagen                         |
| <b>Bischel, 2015</b>                      | Not evaluated                                                                                                         | Not evaluated           | Yes                                                                                                           | Fibroblasts         | Seeded into engineered lumen; formed lumen structure                                                                  | Yes; Mixture of collagen and Matrigel |
| <b>Carter, 2017</b>                       | Not evaluated                                                                                                         | Yes                     | Yes                                                                                                           | Myoepithelial cells | Self-assembled into bilayered luminal structures                                                                      | Yes; Collagen or Matrigel             |
| <b>Debnath, 2003</b>                      | Not evaluated                                                                                                         | Not evaluated           | Yes                                                                                                           | No                  | Self assembled into luminal structures                                                                                | Yes; Matrigel                         |
| <b>Krause, 2010</b>                       | Not evaluated                                                                                                         | Yes                     | Not polarized in collagen only. Polarized with the addition of reconstituted basement membrane or fibroblasts | Fibroblasts         | Self-assembled into spheroids. Addition of reconstituted basement membrane or fibroblasts resulted in lumen formation | Yes; Collagen or Matrigel             |
| <b>Marchese, 2012</b>                     | Yes, E2 affected apoptosis, cell number, hyperplasia                                                                  | Yes                     | Yes                                                                                                           | No                  | Self assembled into luminal structures                                                                                | Yes; Matrigel                         |
| <b>Vantangoli, 2015; Vantangoli, 2017</b> | Yes, E2 affected gene expression and hyperplasia                                                                      | Yes                     | Hemi-polarized                                                                                                | No                  | Self-assembled into microtissues that contained a luminal space                                                       | No; Agarose scaffold                  |

Supplemental Table 2. **Comparison of MCF7-derived duct model to previously published organotypic breast models.**
